# Supplementary material for: Efficacy of Ion-Channel Inhibitors Amantadine, Memantine and Rimantadine for the Treatment of SARS-CoV-2 In Vitro
Source: MDPI journal article supplement (doi:10.3390/v13102082), 2021-10-15
Supplement: s1 [file s1]

**Table S1. Treatment conditions and residual infectivity data from combination treatment assay.**

| Treatment <sup>a</sup> | Concentration<br>( $\mu\text{M}$ ) <sup>b</sup> |      | Residual Infectivity (%) <sup>c</sup> |     |       |
|------------------------|-------------------------------------------------|------|---------------------------------------|-----|-------|
|                        | AMA                                             | REM  | AMA                                   | REM | Combi |
| 1                      | 14.5                                            | 0.3  | 96                                    | 94  | 85    |
| 2                      | 21.7                                            | 0.5  | 93                                    | 92  | 88    |
| 3                      | 32.5                                            | 0.8  | 96                                    | 83  | 98    |
| 4                      | 48.8                                            | 1.1  | 97                                    | 70  | 81    |
| 5                      | 73.2                                            | 1.7  | 80                                    | 60  | 59    |
| 6                      | 109.7                                           | 2.5  | 72                                    | 30  | 51    |
| 7                      | 164.6                                           | 3.8  | 51                                    | 10  | 22    |
| 8                      | 246.9                                           | 5.7  | 31                                    | 3   | 5     |
| 9                      | 370.4                                           | 8.6  | 9                                     | 0   | 0     |
| 10                     | 555.6                                           | 12.9 | 3                                     | 1   | -1    |
| Ratio <sup>d</sup>     | 43                                              | 1    |                                       |     |       |

  

| Treatment <sup>a</sup> | Concentration<br>( $\mu\text{M}$ ) <sup>b</sup> |      | Residual Infectivity (%) <sup>c</sup> |     |       |
|------------------------|-------------------------------------------------|------|---------------------------------------|-----|-------|
|                        | MEM                                             | REM  | MEM                                   | REM | Combi |
| 1                      | 44.7                                            | 1.1  | 84                                    | 80  | 97    |
| 2                      | 55.9                                            | 1.4  | 81                                    | 80  | 75    |
| 3                      | 69.9                                            | 1.8  | 74                                    | 56  | 69    |
| 4                      | 87.4                                            | 2.2  | 39                                    | 64  | 46    |
| 5                      | 109.2                                           | 2.8  | 23                                    | 46  | 22    |
| 6                      | 136.5                                           | 3.5  | 13                                    | 27  | 10    |
| 7                      | 170.7                                           | 4.3  | 5                                     | 13  | 4     |
| 8                      | 213.3                                           | 6.5  | 3                                     | 3   | 1     |
| 9                      | 266.7                                           | 9.7  | 1                                     | 1   | 0     |
| 10                     | 333.3                                           | 12.2 | 1                                     | 1   | 1     |
| Ratio <sup>d</sup>     | 27                                              | 1    |                                       |     |       |

  

| Treatment <sup>a</sup> | Concentration<br>( $\mu\text{M}$ ) <sup>b</sup> |      | Residual Infectivity (%) <sup>c</sup> |     |       |
|------------------------|-------------------------------------------------|------|---------------------------------------|-----|-------|
|                        | RIM                                             | REM  | RIM                                   | REM | Combi |
| 1                      | 5.5                                             | 0.3  | 96                                    | 94  | 101   |
| 2                      | 8.2                                             | 0.5  | 101                                   | 92  | 92    |
| 3                      | 12.4                                            | 0.8  | 86                                    | 83  | 87    |
| 4                      | 18.5                                            | 1.1  | 74                                    | 70  | 62    |
| 5                      | 27.8                                            | 1.7  | 44                                    | 60  | 40    |
| 6                      | 41.7                                            | 2.5  | 26                                    | 30  | 17    |
| 7                      | 62.6                                            | 3.8  | 7                                     | 10  | 0     |
| 8                      | 93.8                                            | 5.7  | 1                                     | 3   | -1    |
| 9                      | 140.7                                           | 8.6  | 1                                     | 0   | -2    |
| 10                     | 211.1                                           | 12.9 | 1                                     | 1   | 0     |
| Ratio <sup>d</sup>     | 16                                              | 1    |                                       |     |       |

<sup>a</sup>Treatment, number of treatment condition and the specified concentrations of inhibitors. Infected cultures were treated with inhibitors either singly or in combination in antiviral treatment assays for analysis of interactions; results of these assays are shown in Figure 2.

<sup>b</sup> Concentration ( $\mu\text{M}$ ), concentrations of inhibitors, AMA, amantadine, MEM, memantine, RIM, rimantadine, REM, remdesivir.

<sup>c</sup> Residual infectivity (%), calculated by relating the number of infected cells in treated cultures to the mean number of infected cells in infected-nontreated control cultures. Residual infectivity is given for single treatments with the specified inhibitors and the respective combination treatments (Combi) for each treatment condition.

<sup>d</sup> Ratio, for all inhibitor combinations a fixed concentration ratio was applied as specified.

**Table S2. Analysis of interactions of ion-channel inhibitors with remdesivir in Compusyn.**

|                | CI <sup>a</sup>     |     |                              |     | DRI <sup>b</sup>    |            |            |                              |            |            |
|----------------|---------------------|-----|------------------------------|-----|---------------------|------------|------------|------------------------------|------------|------------|
|                | Key Fa <sup>c</sup> |     | Experimental Fa <sup>b</sup> |     | Key Fa <sup>c</sup> |            |            | Experimental Fa <sup>d</sup> |            |            |
|                | Key Fa              | CI  | Exp. Fa                      | CI  | Key Fa              | AMA<br>DRI | REM<br>DRI | Exp. Fa                      | AMA<br>DRI | REM<br>DRI |
| <b>AMA+REM</b> | 0.25                | 1.8 | 0.02                         | 5.1 | 0.25                | 1.7        | 0.9        | 0.02                         | 0.5        | 0.3        |
|                | 0.5                 | 1.8 | 0.12                         | 1.3 | 0.5                 | 1.7        | 0.9        | 0.12                         | 2.1        | 1.2        |
|                | 0.75                | 1.8 | 0.15                         | 0.7 | 0.75                | 1.8        | 0.8        | 0.15                         | 4.1        | 2.2        |
|                | 0.9                 | 1.8 | 0.19                         | 2.2 | 0.9                 | 1.9        | 0.8        | 0.19                         | 1.3        | 0.7        |
|                |                     |     | 0.41                         | 2.1 |                     |            |            | 0.41                         | 1.4        | 0.7        |
|                |                     |     | 0.49                         | 2.6 |                     |            |            | 0.49                         | 1.2        | 0.6        |
|                |                     |     | 0.78                         | 2.2 |                     |            |            | 0.78                         | 1.5        | 0.7        |
|                |                     |     | 0.95                         | 1.5 |                     |            |            | 0.95                         | 2.3        | 1.0        |
|                |                     |     | 0.99                         | 1.0 |                     |            |            | 0.99                         | 3.6        | 1.3        |
|                |                     |     | 0.99                         | 1.5 |                     |            |            | 0.99                         | 2.4        | 0.9        |
| <b>MEM+REM</b> | 0.25                | 1.8 | 0.03                         | 2.7 | 0.25                | 1.4        | 1.0        | 0.03                         | 1.0        | 0.6        |
|                | 0.5                 | 1.7 | 0.25                         | 1.6 | 0.5                 | 1.4        | 1.0        | 0.25                         | 1.5        | 1.1        |
|                | 0.75                | 1.7 | 0.31                         | 1.9 | 0.75                | 1.3        | 1.1        | 0.31                         | 1.3        | 0.9        |
|                | 0.9                 | 1.6 | 0.54                         | 1.7 | 0.9                 | 1.3        | 1.2        | 0.54                         | 1.4        | 1.1        |
|                |                     |     | 0.78                         | 1.5 |                     |            |            | 0.78                         | 1.5        | 1.2        |
|                |                     |     | 0.9                          | 1.4 |                     |            |            | 0.9                          | 1.6        | 1.4        |
|                |                     |     | 0.96                         | 1.2 |                     |            |            | 0.96                         | 1.7        | 1.6        |
|                |                     |     | 0.99                         | 1.2 |                     |            |            | 0.99                         | 1.7        | 1.7        |
|                |                     |     | 0.99                         | 1.8 |                     |            |            | 0.99                         | 1.1        | 1.2        |
|                |                     |     | 0.99                         | 2.2 |                     |            |            | 0.99                         | 0.9        | 0.9        |
| <b>RIM+REM</b> | 0.25                | 1.9 | 0.01                         | 2.7 | 0.25                | 1.2        | 1.0        | 0.01                         | 0.9        | 0.6        |
|                | 0.5                 | 1.8 | 0.08                         | 1.8 | 0.5                 | 1.2        | 1.1        | 0.08                         | 1.3        | 1.0        |
|                | 0.75                | 1.7 | 0.13                         | 2.3 | 0.75                | 1.2        | 1.2        | 0.13                         | 1.0        | 0.8        |
|                | 0.9                 | 1.6 | 0.38                         | 1.7 | 0.9                 | 1.2        | 1.3        | 0.38                         | 1.2        | 1.1        |
|                |                     |     | 0.6                          | 1.9 |                     |            |            | 0.6                          | 1.1        | 1.0        |
|                |                     |     | 0.83                         | 1.7 |                     |            |            | 0.83                         | 1.2        | 1.2        |
|                |                     |     | 0.99                         | 0.8 |                     |            |            | 0.99                         | 2.4        | 3          |
|                |                     |     | 0.99                         | 1.1 |                     |            |            | 0.99                         | 1.6        | 2          |
|                |                     |     | 0.99                         | 1.7 |                     |            |            | 0.99                         | 1.0        | 1.3        |
|                |                     |     | 0.99                         | 2.6 |                     |            |            | 0.99                         | 0.7        | 0.9        |

  

| CI                                                                                  | DRI                                                                                                 |
|-------------------------------------------------------------------------------------|-----------------------------------------------------------------------------------------------------|
|  |  DRI ≥ 20      |
|  |  10 ≤ DRI < 20 |
|  |  5 ≤ DRI < 10  |
|  |  3 ≤ DRI < 5   |
|  |  1.5 ≤ DRI < 3 |
|  |  DRI < 1.5     |
|  |                                                                                                     |
|  |                                                                                                     |
|  |                                                                                                     |
|  |                                                                                                     |
|  |                                                                                                     |
|  |                                                                                                     |
|  |                                                                                                     |
|  |                                                                                                     |
|  |                                                                                                     |
|  |                                                                                                     |
|  |                                                                                                     |
|  |                                                                                                     |

<sup>a</sup> CI, Combination index values generated by analysis in CompuSyn of data from short-term treatment assays carried out for analysis of interactions of ion-channel inhibitors amantadine (AMA), memantine (MEM), rimantadine (RIM) and remdesivir (REM) (Figure 2 and Table S1). Graphical illustrations of these results are shown in Figure S5 B and C. CI are color-coded

according to the legend below the table and reflect the mode of interaction. In the range

$0.85 \leq CI < 0.9$  (slight synergism), no values were recorded.

<sup>b</sup> DRI, Drug reduction index values generated by CompuSyn analysis. DRI values are color-coded according to the legend below the table. Graphical illustrations of these results are shown in Figure S5 D.

<sup>c</sup> Key Fa, key fractional effects identical with key inhibition percentages (0.25, 0.5, 0.75 and 0.9).

<sup>d</sup> Experimental Fa, fractional effects identical with inhibition percentages achieved at experimental datapoints

**Table S3. Next generation sequencing of SARS-CoV-2 genomes from long-term treatment experiments.**

| Nucleotide position <sup>a</sup> | Reference nucleotide <sup>b</sup> | Nucleotide change <sup>c</sup> | Frequency in non-treated day 5 (%) <sup>d</sup> | Frequency in Amantadine 3xEC50 day 5 (%) <sup>e</sup> | Frequency in Memantine 3xEC50 day 5 (%) <sup>e</sup> | Frequency in Rimantadine 3xEC50 day 5 (%) <sup>e</sup> | Frequency in Rimantadine 7xEC50 day 7 (%) <sup>e</sup> | Amino acid change <sup>f</sup> | SARS-CoV-2 protein <sup>g</sup> |
|----------------------------------|-----------------------------------|--------------------------------|-------------------------------------------------|-------------------------------------------------------|------------------------------------------------------|--------------------------------------------------------|--------------------------------------------------------|--------------------------------|---------------------------------|
| 2343                             | T                                 | G                              | -                                               | -                                                     | -                                                    | -                                                      | 99.7                                                   | I513S                          | nsp2                            |
| 3162                             | C                                 | A                              | -                                               | -                                                     | 21.6                                                 | -                                                      | -                                                      | S148Y                          | nsp3                            |
| 3482                             | G                                 | A                              | -                                               | -                                                     | 52.0                                                 | -                                                      | -                                                      | G255R                          | nsp3                            |
| 11522                            | T                                 | G                              | -                                               | -                                                     | -                                                    | 98.6                                                   | -                                                      | F184V                          | nsp6                            |
| 16534                            | A                                 | G                              | 5.5                                             | -                                                     | -                                                    | -                                                      | -                                                      | S100G                          | nsp13                           |
| 17368                            | A                                 | G                              | 5.2                                             | -                                                     | -                                                    | -                                                      | -                                                      | M378V                          | nsp13                           |
| 17964                            | G                                 | T                              | 6.3                                             | -                                                     | -                                                    | -                                                      | -                                                      | M576I                          | nsp13                           |
| 22487                            | A                                 | G                              | 52.6                                            | 89.8                                                  | 23.1                                                 | 99.5                                                   | -                                                      | K309E                          | S                               |

<sup>a</sup>Nucleotide position relating to the SARS-CoV-2/human/Denmark/DK-AHH1/2020 genome

sequence (GenBank accession number MZ049597). Coding nucleotide changes occurring in at least one of the analyzed virus populations with  $\geq 5\%$  prevalence are listed.

<sup>b</sup>Nucleotide identity in the SARS-CoV-2/human/Denmark/DK-AHH1/2020 sequence.

<sup>c</sup>Changed nucleotide detected in cell culture derived virus.

<sup>d</sup>Frequency of the indicated nucleotide change in the genomes of the viral population in the nontreated culture on day 5 post infection. -, frequency of the indicated nucleotide change was below the limit of detection.

<sup>e</sup>Frequency of the indicated nucleotide change in the genomes in the viral populations in cultures subjected to the specified treatments at the given timepoint post infection and treatment initiation. -, frequency of the indicated nucleotide change was below the limit of detection

<sup>f</sup>Amino acid change encoded by the given nucleotide change. Position numbers relate to the respective protein of SARS-CoV-2/human/Denmark/DK-AHH1/2020.

<sup>g</sup>SARS-CoV-2 protein, where the given amino acid change is located.

**Table S4. Pharmacokinetics of adamantane derivatives**

<sup>a</sup>C<sub>max</sub>, maximum plasma concentrations (μM) of ion-channel inhibitors achieved in patients after

| Inhibitor   | C <sub>max</sub><br>(μM) <sup>a</sup> | C <sub>max</sub> /EC <sub>50</sub> <sup>b</sup> | Dose <sup>c</sup> | PPB <sup>d</sup> | Distribution<br>to lungs <sup>e</sup> | References <sup>f</sup>                                                                                                                                                                                                                                                                                                                                                                                                                |
|-------------|---------------------------------------|-------------------------------------------------|-------------------|------------------|---------------------------------------|----------------------------------------------------------------------------------------------------------------------------------------------------------------------------------------------------------------------------------------------------------------------------------------------------------------------------------------------------------------------------------------------------------------------------------------|
| Amantadine  | 2.7                                   | 0.02/0.02/0.03                                  | 200mg single dose | 67%              | High                                  | <a href="https://www.accessdata.fda.gov/drugsatfda_docs/label/2009/016023s041,018101s0161bl.pdf">https://www.accessdata.fda.gov/drugsatfda_docs/label/2009/016023s041,018101s0161bl.pdf</a> ,<br>Bleidner, W. E., Harmon, J. B., Hewes, W. E., Lynes, T. E. & Hermann, E. C. ABSORPTION,<br>DISTRIBUTION AND EXCRETION OF AMANTADINE HYDROCHLORIDE. <i>J. Pharmacol. Exp. Ther.</i><br>150, (1965)<br>doi: 10.1007/s12325-019-01044-y, |
| Memantine   | 0.1                                   | 0.001/0.001/0.001                               | 20mg single dose  | 45%              | High                                  | Kuns, B., Rosnai, A. & Varghese, D. Memantine - StatPearls - NCBI Bookshelf. Memantine<br>(2020)                                                                                                                                                                                                                                                                                                                                       |
| Rimantadine | 2.2                                   | 0.06/0.08/0.03                                  | 100mg/12hrs       | 40%              | na                                    | <a href="https://www.accessdata.fda.gov/drugsatfda_docs/label/2010/019649s0151bl.pdf">https://www.accessdata.fda.gov/drugsatfda_docs/label/2010/019649s0151bl.pdf</a>                                                                                                                                                                                                                                                                  |

administration of specified dose(s). For rimantadine C<sub>max</sub> values were determined at steady state after multiple dosings.

<sup>b</sup>C<sub>max</sub>/EC<sub>50</sub>, peak plasma concentration (μM) relative to the EC<sub>50</sub> (μM) of inhibitor against SARS-CoV-2 determined in VeroE6, Huh7.5 and A549-hACE2 cells, respectively (Figure 1, Table 1).

<sup>c</sup>Dose, dosing scheme leading to the reported C<sub>max</sub> values. All doses are in accordance to recommended clinical dosings.

<sup>d</sup>PPB, plasma protein binding, % of compound bound to plasma proteins according to FDA reports.

<sup>e</sup>Distribution of inhibitor to pulmonary tissue relative to C<sub>max</sub>. na, data not available.

<sup>f</sup>References for listed C<sub>max</sub> values and distribution. Values were extracted from either FDA reports or if not available, values were extracted from publications on representative clinical studies
