# Supplementary material
Source: MDPI journal article supplement (https://www.mdpi.com/1999-4915/13/10/2082)
Supplement: s1 [file s1]

Archive with 2 entries (2 files):
- Supplementary Figures and Materials and Methods.pdf
- Supplementary Tables.pdf
